# Supplementary material for: Match Analysis in Women’s Tennis on Clay, Grass and Hard Courts
Source: MDPI journal article supplement (doi:10.3390/ijerph19137955), 2022-06-29
Supplement: s1 [file s1]

**Table S1.** Distribution of the points played on the different surfaces in the 2019 season, analysis of the distribution of the categories of each by surface ( $\chi^2$  intra-criteria) and comparative analysis among surfaces ( $\chi^2$  inter-criteria).

| Criteria             | Code | Clay |       | $\chi^2$ Intra<br>Criteria CL | Grass |       | $\chi^2$ Intra<br>Criteria GR | Hard court |       | $\chi^2$ Intra<br>Criteria HC | $\chi^2$ Inter criteria                     | Coef.<br>Contig. |
|----------------------|------|------|-------|-------------------------------|-------|-------|-------------------------------|------------|-------|-------------------------------|---------------------------------------------|------------------|
|                      |      | n    | %     |                               | n     | %     |                               | n          | %     |                               |                                             |                  |
| SERVICE SIDE         | AD   | 466  | 48.3% | $\chi^2=1.062$                | 409   | 47.9% | $\chi^2=1.518$                | 453        | 48.1% | $\chi^2=1.302$                | $\chi^2=(2,N=2759)=.036$ ;<br>$p=.982$      | .004             |
|                      | DE   | 498  | 51.7% | $p=.303$                      | 445   | 52.1% | $p=.218$                      | 488        | 51.9% | $p=.254$                      |                                             |                  |
| SERVICE              | DF   | 27   | 2.8%  | $\chi^2=602.716$              | 22    | 2.6%  | $\chi^2=513.311$              | 45         | 4.8%  | $\chi^2=412.829$              | $\chi^2=(4,N=2759)=$<br>21.069;<br>$p<.000$ | .087             |
|                      | FS   | 647  | 67.1% | $p<.000$                      | 562   | 65.8% | $p<.000$                      | 551        | 58.6% | $p<.000$                      |                                             |                  |
|                      | SS   | 290  | 30.1% |                               | 270   | 31.6% |                               | 345        | 36.7% |                               |                                             |                  |
| SERVICE<br>DIRECTION | CN   | 274  | 28.4% | $\chi^2=15.693$               | 267   | 31.3% | $\chi^2=14.939$               | 273        | 29.0% | $\chi^2=9.909$                | $\chi^2=(4,N=2759)=$<br>8.870;<br>$p=.064$  | .057             |
|                      | T    | 374  | 38.8% | $p<.000$                      | 337   | 39.5% | $p<.001$                      | 334        | 35.5% | $p<.019$                      |                                             |                  |
|                      | W    | 316  | 32.8% |                               | 250   | 29.3% |                               | 334        | 35.5% |                               |                                             |                  |
| RALLY                | LN   | 122  | 12.7% | $\chi^2=417.320$              | 86    | 10.1% | $\chi^2=438.143$              | 83         | 8.8%  | $\chi^2=615.617$              | $\chi^2=(4,N=2759)=$<br>13.890; $p=.008$    | .071             |
|                      | MD   | 228  | 23.7% | $p<.000$                      | 203   | 23.8% | $p<.000$                      | 191        | 20.3% | $p<.000$                      |                                             |                  |
|                      | SH   | 614  | 63.7% |                               | 565   | 66.2% |                               | 667        | 70.9% |                               |                                             |                  |
| FINAL STROKE         | ACE  | 38   | 3.9%  |                               | 49    | 5.7%  |                               | 63         | 6.7%  |                               | $\chi^2=(6,N=2759)=$<br>9.755; $p=.135$     | .059             |
|                      | BH   | 364  | 37.8% | $\chi^2=391.643$              | 305   | 35.7% | $\chi^2=298.056$              | 358        | 38.0% | $\chi^2=343.510$              |                                             |                  |
|                      | FH   | 413  | 42.8% | $p<.000$                      | 363   | 42.5% | $p<.000$                      | 392        | 41.7% | $p<.000$                      |                                             |                  |
|                      | OTH  | 149  | 15.5% |                               | 137   | 16.0% |                               | 128        | 13.6% |                               |                                             |                  |
| FINALIZATION         | BSO  | 215  | 22.3% |                               | 164   | 19.2% |                               | 199        | 21.1% |                               | $\chi^2=(14,N=2759)=$<br>32.172; $p=.004$   | .107             |
|                      | LTO  | 146  | 15.1% |                               | 140   | 16.4% |                               | 129        | 13.7% |                               |                                             |                  |
|                      | NET  | 272  | 28.2% |                               | 216   | 25.3% |                               | 282        | 30.0% |                               |                                             |                  |
|                      | Z1   | 108  | 11.2% | $\chi^2=424.747$              | 144   | 16.9% | $\chi^2=317.016$              | 111        | 11.8% | $\chi^2=434.736$              |                                             |                  |
|                      | Z2   | 39   | 4.0%  | $p<.000$                      | 34    | 4.0%  | $p<.000$                      | 57         | 6.1%  | $p<.000$                      |                                             |                  |
|                      | Z3   | 33   | 3.4%  |                               | 17    | 2.0%  |                               | 25         | 2.7%  |                               |                                             |                  |
|                      | Z4   | 67   | 7.0%  |                               | 67    | 7.8%  |                               | 56         | 6.0%  |                               |                                             |                  |
| WINNER               | Z5   | 84   | 8.7%  |                               | 72    | 8.4%  |                               | 82         | 8.7%  |                               |                                             |                  |
|                      | RW   | 395  | 41.0% | $\chi^2=31.407$               | 350   | 41.0% | $\chi^2=27.770$               | 386        | 41.0% | $\chi^2=30.352$               | $\chi^2=(2,N=2759)=.000$ ;<br>$p=1.000$     | .000             |
|                      | SW   | 569  | 59.0% | $p<.000$                      | 504   | 59.0% | $p<.000$                      | 555        | 59.0% | $p<.000$                      |                                             |                  |
| RESOLUTION           | RWFE | 56   | 5.8%  |                               | 71    | 8.3%  |                               | 60         | 6.4%  |                               | $\chi^2=(10,N=2759)=$<br>16.387; $p=.089$   | .077             |
|                      | RWUE | 220  | 22.8% |                               | 159   | 18.6% |                               | 220        | 23.4% |                               |                                             |                  |
|                      | RWW  | 119  | 12.3% | $\chi^2=140.535$              | 119   | 13.9% | $\chi^2=84.726$               | 106        | 11.3% | $\chi^2=157.332$              |                                             |                  |
|                      | SWFE | 143  | 14.8% | $p<.000$                      | 116   | 13.6% | $p<.000$                      | 123        | 13.1% | $p<.000$                      |                                             |                  |
|                      | SWUE | 230  | 23.9% |                               | 192   | 22.5% |                               | 233        | 24.8% |                               |                                             |                  |
|                      | SWW  | 196  | 20.3% |                               | 197   | 23.1% |                               | 199        | 21.1% |                               |                                             |                  |

**Table S2.** Distribution of the points played with first service to the deuce and the advantage side, distribution analysis of the categories of each criteria by surface ( $\chi^2$  intra-criteria) and comparative analysis among surfaces ( $\chi^2$  inter-criteria).

| Criteria                  | Code | Clay |       | χ <sup>2</sup> Intra<br>Criteria CL       | Grass |       | χ <sup>2</sup> Intra<br>Criteria GR       | Hard court |       | χ <sup>2</sup> Intra<br>Criteria HC       | χ <sup>2</sup> Inter<br>criteria                      | Coef.<br>Contig. |
|---------------------------|------|------|-------|-------------------------------------------|-------|-------|-------------------------------------------|------------|-------|-------------------------------------------|-------------------------------------------------------|------------------|
|                           |      | n    | %     |                                           | n     | %     |                                           | n          | %     |                                           |                                                       |                  |
| FIRST SERVICE (DEUCE)     |      |      |       |                                           |       |       |                                           |            |       |                                           |                                                       |                  |
| SERVICE<br>DIRECTION      | CN   | 72   | 21.1% | χ <sup>2</sup> =47.228<br><i>p</i> <.000  | 42    | 14.0% | χ <sup>2</sup> =54.380<br><i>p</i> <.000  | 48         | 16.8% | χ <sup>2</sup> =35.587<br><i>p</i> <.000  | χ <sup>2</sup> =(4,N=928)=<br>17.662; <i>p</i> =.001  | .137             |
|                           | T    | 172  | 50.3% |                                           | 143   | 47.7% |                                           | 115        | 40.2% |                                           |                                                       |                  |
|                           | W    | 98   | 28.7% |                                           | 115   | 38.3% |                                           | 123        | 43.0% |                                           |                                                       |                  |
| RALLY                     | LN   | 31   | 9.1%  | χ <sup>2</sup> =168.228<br><i>p</i> <.000 | 26    | 8.7%  | χ <sup>2</sup> =197.660<br><i>p</i> <.000 | 21         | 7.3%  | χ <sup>2</sup> =236.734<br><i>p</i> <.000 | χ <sup>2</sup> =(4,N=928)=<br>9.725; <i>p</i> =.045   | .102             |
|                           | MD   | 89   | 26.0% |                                           | 61    | 20.3% |                                           | 48         | 16.8% |                                           |                                                       |                  |
|                           | SH   | 222  | 64.9% |                                           | 213   | 71.0% |                                           | 217        | 75.9% |                                           |                                                       |                  |
| FINAL STROKE              | ACE  | 18   | 5.3%  | χ <sup>2</sup> =153.673<br><i>p</i> <.000 | 28    | 9.3%  | χ <sup>2</sup> =110.640<br><i>p</i> <.000 | 34         | 11.9% | χ <sup>2</sup> =90.531<br><i>p</i> <.000  | χ <sup>2</sup> =(6,N=928)=<br>12.122; <i>p</i> =.059  | .114             |
|                           | BH   | 134  | 39.2% |                                           | 106   | 35.3% |                                           | 117        | 40.9% |                                           |                                                       |                  |
|                           | FH   | 150  | 43.9% |                                           | 133   | 44.3% |                                           | 106        | 37.1% |                                           |                                                       |                  |
|                           | OTH  | 40   | 11.7% |                                           | 33    | 11.0% |                                           | 29         | 10.1% |                                           |                                                       |                  |
| FINALIZATION              | BSO  | 75   | 21.9% | χ <sup>2</sup> =163.731<br><i>p</i> <.000 | 61    | 20.3% | χ <sup>2</sup> =120.960<br><i>p</i> <.000 | 57         | 19.9% | χ <sup>2</sup> =136.322<br><i>p</i> <.000 | χ <sup>2</sup> =(14,N=928)=<br>19.206; <i>p</i> =.157 | .142             |
|                           | LTO  | 52   | 15.2% |                                           | 53    | 17.7% |                                           | 31         | 10.8% |                                           |                                                       |                  |
|                           | NET  | 97   | 28.4% |                                           | 75    | 25.0% |                                           | 85         | 29.7% |                                           |                                                       |                  |
|                           | Z1   | 44   | 12.9% |                                           | 51    | 17.0% |                                           | 50         | 17.5% |                                           |                                                       |                  |
|                           | Z2   | 6    | 1.8%  |                                           | 14    | 4.7%  |                                           | 16         | 5.6%  |                                           |                                                       |                  |
|                           | Z3   | 7    | 2.0%  |                                           | 7     | 2.3%  |                                           | 5          | 1.7%  |                                           |                                                       |                  |
|                           | Z4   | 31   | 9.1%  |                                           | 23    | 7.7%  |                                           | 21         | 7.3%  |                                           |                                                       |                  |
|                           | Z5   | 30   | 8.8%  |                                           | 16    | 5.3%  |                                           | 21         | 7.3%  |                                           |                                                       |                  |
| WINNER                    | RW   | 129  | 37.7% | χ <sup>2</sup> =20.632<br><i>p</i> <.000  | 108   | 36.0% | χ <sup>2</sup> =23.520<br><i>p</i> <.000  | 92         | 32.2% | χ <sup>2</sup> =36.378<br><i>p</i> <.000  | χ <sup>2</sup> =(2,N=928)=<br>2.156; <i>p</i> =.340   | .048             |
|                           | SW   | 213  | 62.3% |                                           | 192   | 64.0% |                                           | 194        | 67.8% |                                           |                                                       |                  |
| RESOLUTION                | RWFE | 26   | 7.6%  | χ <sup>2</sup> =39.298<br><i>p</i> <.000  | 22    | 7.3%  | χ <sup>2</sup> =39.520<br><i>p</i> <.000  | 17         | 5.9%  | χ <sup>2</sup> =64.014<br><i>p</i> <.000  | χ <sup>2</sup> =(10,N=928)=<br>5.192; <i>p</i> =.878  | .075             |
|                           | RWUE | 65   | 19.0% |                                           | 52    | 17.3% |                                           | 49         | 17.1% |                                           |                                                       |                  |
|                           | RWW  | 38   | 11.1% |                                           | 34    | 11.3% |                                           | 26         | 9.1%  |                                           |                                                       |                  |
|                           | SWFE | 58   | 17.0% |                                           | 52    | 17.3% |                                           | 50         | 17.5% |                                           |                                                       |                  |
|                           | SWUE | 75   | 21.9% |                                           | 62    | 20.7% |                                           | 57         | 19.9% |                                           |                                                       |                  |
|                           | SWW  | 80   | 23.4% |                                           | 78    | 26.0% |                                           | 87         | 30.4% |                                           |                                                       |                  |
| FIRST SERVICE (ADVANTAGE) |      |      |       |                                           |       |       |                                           |            |       |                                           |                                                       |                  |
| SERVICE<br>DIRECTION      | CN   | 68   | 22.3% | χ <sup>2</sup> =16.964<br><i>p</i> <.000  | 64    | 24.4% | χ <sup>2</sup> =16.771<br><i>p</i> <.000  | 46         | 17.4% | χ <sup>2</sup> =30.709<br><i>p</i> <.000  | χ <sup>2</sup> =(4,N=832)=<br>9.020; <i>p</i> =.061   | .104             |
|                           | T    | 115  | 37.7% |                                           | 117   | 44.7% |                                           | 113        | 42.6% |                                           |                                                       |                  |
|                           | W    | 122  | 40.0% |                                           | 81    | 30.9% |                                           | 106        | 40.0% |                                           |                                                       |                  |
| RALLY                     | LN   | 35   | 11.5% | χ <sup>2</sup> =148.689<br><i>p</i> <.000 | 29    | 11.1% | χ <sup>2</sup> =105.855<br><i>p</i> <.000 | 21         | 7.9%  | χ <sup>2</sup> =172.649<br><i>p</i> <.000 | χ <sup>2</sup> =(4,N=832)=<br>5.432; <i>p</i> =.246   | .081             |
|                           | MD   | 70   | 23.0% |                                           | 71    | 27.1% |                                           | 57         | 21.5% |                                           |                                                       |                  |
|                           | SH   | 200  | 65.6% |                                           | 162   | 61.8% |                                           | 187        | 70.6% |                                           |                                                       |                  |
| FINAL STROKE              | ACE  | 20   | 6.6%  | χ <sup>2</sup> =105.452<br><i>p</i> <.000 | 16    | 6.1%  | χ <sup>2</sup> =87.466<br><i>p</i> <.000  | 28         | 10.6% | χ <sup>2</sup> =102.291<br><i>p</i> <.000 | χ <sup>2</sup> =(6,N=832)=<br>10.419; <i>p</i> =.108  | .111             |
|                           | BH   | 114  | 37.4% |                                           | 92    | 35.1% |                                           | 88         | 33.2% |                                           |                                                       |                  |
|                           | FH   | 126  | 41.3% |                                           | 111   | 42.4% |                                           | 123        | 46.4% |                                           |                                                       |                  |
|                           | OTH  | 45   | 14.8% |                                           | 43    | 16.4% |                                           | 26         | 9.8%  |                                           |                                                       |                  |
| FINALIZATION              | BSO  | 74   | 24.3% | χ <sup>2</sup> =162.069<br><i>p</i> <.000 | 53    | 20.2% | χ <sup>2</sup> =100.931<br><i>p</i> <.000 | 49         | 18.5% | χ <sup>2</sup> =148.313<br><i>p</i> <.000 | χ <sup>2</sup> =(14,N=832)=<br>23.926; <i>p</i> =.047 | .167             |
|                           | LTO  | 34   | 11.1% |                                           | 43    | 16.4% |                                           | 34         | 12.8% |                                           |                                                       |                  |
|                           | NET  | 91   | 29.8% |                                           | 63    | 24.0% |                                           | 87         | 32.8% |                                           |                                                       |                  |
|                           | Z1   | 42   | 13.8% |                                           | 48    | 18.3% |                                           | 40         | 15.1% |                                           |                                                       |                  |
|                           | Z2   | 11   | 3.6%  |                                           | 12    | 4.6%  |                                           | 9          | 3.4%  |                                           |                                                       |                  |
|                           | Z3   | 17   | 5.6%  |                                           | 3     | 1.1%  |                                           | 8          | 3.0%  |                                           |                                                       |                  |
|                           | Z4   | 12   | 3.9%  |                                           | 19    | 7.3%  |                                           | 12         | 4.5%  |                                           |                                                       |                  |
|                           | Z5   | 24   | 7.9%  |                                           | 21    | 8.0%  |                                           | 26         | 9.8%  |                                           |                                                       |                  |
| WINNER                    | RW   | 114  | 37.4% | χ <sup>2</sup> =19.439<br><i>p</i> <.000  | 93    | 35.5% | χ <sup>2</sup> =22.046<br><i>p</i> <.000  | 87         | 32.8% | χ <sup>2</sup> =31.249<br><i>p</i> <.000  | χ <sup>2</sup> =(2,N=832)=<br>1.287; <i>p</i> =.525   | .039             |
|                           | SW   | 191  | 62.6% |                                           | 169   | 64.5% |                                           | 178        | 67.2% |                                           |                                                       |                  |
| RESOLUTION                | RWFE | 14   | 4.6%  | χ <sup>2</sup> =41.013<br><i>p</i> <.000  | 27    | 10.3% | χ <sup>2</sup> =41.618<br><i>p</i> <.000  | 13         | 4.9%  | χ <sup>2</sup> =53.589<br><i>p</i> <.000  | χ <sup>2</sup> =(10,N=832)=<br>23.576; <i>p</i> =.009 | .166             |
|                           | RWUE | 60   | 19.7% |                                           | 31    | 11.8% |                                           | 50         | 18.9% |                                           |                                                       |                  |
|                           | RWW  | 40   | 13.1% |                                           | 34    | 13.0% |                                           | 24         | 9.1%  |                                           |                                                       |                  |
|                           | SWFE | 59   | 19.3% |                                           | 34    | 13.0% |                                           | 48         | 18.1% |                                           |                                                       |                  |
|                           | SWUE | 66   | 21.6% |                                           | 66    | 25.2% |                                           | 59         | 22.3% |                                           |                                                       |                  |
|                           | SWW  | 66   | 21.6% |                                           | 70    | 26.7% |                                           | 71         | 26.8% |                                           |                                                       |                  |

**Table S3.** Distribution of points played with second service to the deuce and of the advantage court. Analysis of the distribution of the categories of each criterion by surface ( $\chi^2$  intra-criteria) and comparative analysis among the surfaces ( $\chi^2$  inter-criteria).

| Criteria                          | Code | Clay |       | $\chi^2$ Intra Criteria CL | Grass |       | $\chi^2$ Intra Criteria GR | Hard court |       | $\chi^2$ Intra Criteria HC | $\chi^2$ Inter criteria      | Coef. Contig. |
|-----------------------------------|------|------|-------|----------------------------|-------|-------|----------------------------|------------|-------|----------------------------|------------------------------|---------------|
|                                   |      | n    | %     |                            | n     | %     |                            | n          | %     |                            |                              |               |
| <b>SECOND SERVICE (DEUCE)</b>     |      |      |       |                            |       |       |                            |            |       |                            |                              |               |
| SERVICE DIRECTION                 | CN   | 59   | 41.0% | $\chi^2=18.042$            | 72    | 54.1% | $\chi^2=29.970$            | 81         | 44.3% | $\chi^2=11.016$            | $\chi^2=(4,N=460)= 10.713;$  | .151          |
|                                   | T    | 61   | 42.4% | $p<.000$                   | 40    | 30.1% | $p<.000$                   | 57         | 31.1% | $p<.004$                   | $p=.030$                     |               |
|                                   | W    | 24   | 16.7% |                            | 21    | 15.8% |                            | 45         | 24.6% |                            |                              |               |
| RALLY                             | LN   | 32   | 22.2% | $\chi^2=34.042$            | 21    | 15.8% | $\chi^2=48.917$            | 21         | 11.5% | $\chi^2=68.852$            | $\chi^2=(4,N=460)= 7.773;$   | .129          |
|                                   | MD   | 31   | 21.5% | $p<.000$                   | 30    | 22.6% | $p<.000$                   | 51         | 27.9% | $p<.000$                   | $p=.100$                     |               |
|                                   | SH   | 81   | 56.2% |                            | 82    | 61.7% |                            | 111        | 60.7% |                            |                              |               |
| FINAL STROKE                      | ACE  | 0    | 0.0%  | $\chi^2=32.667$            | 3     | 2.3%  | $\chi^2=68.714$            | 0          | 0.0%  | $\chi^2=54.689$            | $\chi^2=(6,N=460)= 9.628;$   | .143          |
|                                   | BH   | 60   | 41.7% | $p<.000$                   | 53    | 39.8% | $p<.000$                   | 75         | 41.0% | $p<.000$                   | $p=.141$                     |               |
|                                   | FH   | 68   | 47.2% |                            | 60    | 45.1% |                            | 93         | 50.8% |                            |                              |               |
|                                   | OTH  | 16   | 11.1% |                            | 17    | 12.8% |                            | 15         | 8.2%  |                            |                              |               |
| FINALIZATION                      | BSO  | 36   | 25.0% | $\chi^2=71.556$            | 23    | 17.3% | $\chi^2=60.383$            | 49         | 26.8% | $\chi^2=107.754$           | $\chi^2=(14,N=460)= 8.472;$  | .134          |
|                                   | LTO  | 29   | 20.1% | $p<.000$                   | 22    | 16.5% | $p<.000$                   | 29         | 15.8% | $p<.000$                   | $p=.863$                     |               |
|                                   | NET  | 36   | 25.0% |                            | 40    | 30.1% |                            | 52         | 28.4% |                            |                              |               |
|                                   | Z1   | 10   | 6.9%  |                            | 10    | 7.5%  |                            | 9          | 4.9%  |                            |                              |               |
|                                   | Z2   | 3    | 2.1%  |                            | 3     | 2.3%  |                            | 4          | 2.2%  |                            |                              |               |
|                                   | Z3   | 5    | 3.5%  |                            | 5     | 3.8%  |                            | 8          | 4.4%  |                            |                              |               |
|                                   | Z4   | 13   | 9.0%  |                            | 12    | 9.0%  |                            | 12         | 6.6%  |                            |                              |               |
|                                   | Z5   | 12   | 8.3%  |                            | 18    | 13.5% |                            | 20         | 10.9% |                            |                              |               |
| WINNER                            | RW   | 63   | 43.8% | $\chi^2=2.250$             | 61    | 45.9% | $\chi^2=.910$              | 84         | 45.9% | $\chi^2=1.230$             | $\chi^2=(2,N=460)= .182;$    | .020          |
|                                   | SW   | 81   | 56.2% | $p=.134$                   | 72    | 54.1% | $p=.340$                   | 99         | 54.1% | $p=.268$                   | $p=.913$                     |               |
| RESOLUTION                        | RWFE | 9    | 6.2%  | $\chi^2=38.917$            | 14    | 10.5% | $\chi^2=14.383$            | 15         | 8.2%  | $\chi^2=61.361$            | $\chi^2=(10,N=460)= 10.885;$ | .152          |
|                                   | RWUE | 35   | 24.3% | $p<.000$                   | 25    | 18.8% | $p=.013$                   | 37         | 20.2% | $p<.000$                   | $p=.367$                     |               |
|                                   | RWW  | 19   | 13.2% |                            | 22    | 16.5% |                            | 32         | 17.5% |                            |                              |               |
|                                   | SWFE | 13   | 9.0%  |                            | 12    | 9.0%  |                            | 13         | 7.1%  |                            |                              |               |
|                                   | SWUE | 45   | 31.2% |                            | 33    | 24.8% |                            | 65         | 35.5% |                            |                              |               |
|                                   | SWW  | 23   | 16.0% |                            | 27    | 20.3% |                            | 21         | 11.5% |                            |                              |               |
| <b>SECOND SERVICE (ADVANTAGE)</b> |      |      |       |                            |       |       |                            |            |       |                            |                              |               |
| SERVICE DIRECTION                 | CN   | 61   | 41.8% | $\chi^2=21.959$            | 82    | 59.9% | $\chi^2=43.460$            | 75         | 46.3% | $\chi^2=13.370$            | $\chi^2=(4,N=445)= 18.844;$  | .202          |
|                                   | T    | 22   | 15.1% | $p<.000$                   | 26    | 19.0% | $p<.000$                   | 38         | 23.5% | $p<.001$                   | $p<.001$                     |               |
|                                   | W    | 63   | 43.2% |                            | 29    | 21.2% |                            | 49         | 30.2% |                            |                              |               |
| RALLY                             | LN   | 24   | 16.4% | $\chi^2=40.493$            | 10    | 7.3%  | $\chi^2=63.956$            | 20         | 12.3% | $\chi^2=80.111$            | $\chi^2=(4,N=445)= 7.798;$   | .131          |
|                                   | MD   | 38   | 26.0% | $p<.000$                   | 41    | 29.9% | $p<.000$                   | 35         | 21.6% | $p<.000$                   | $p<.099$                     |               |
|                                   | SH   | 84   | 57.5% |                            | 86    | 62.8% |                            | 107        | 66.0% |                            |                              |               |
| FINAL STROKE                      | ACE  | 0    | 0.0%  | $\chi^2=25.329$            | 2     | 1.5%  | $\chi^2=64.022$            | 1          | 0.6%  | $\chi^2=113.407$           | $\chi^2=(6,N=445)= 9.105;$   | .142          |
|                                   | BH   | 56   | 38.4% | $p<.000$                   | 54    | 39.4% | $p<.000$                   | 78         | 48.1% | $p<.000$                   | $p=.168$                     |               |
|                                   | FH   | 69   | 47.3% |                            | 59    | 43.1% |                            | 70         | 43.2% |                            |                              |               |
|                                   | OTH  | 21   | 14.4% |                            | 22    | 16.1% |                            | 13         | 8.0%  |                            |                              |               |
| FINALIZATION                      | BSO  | 30   | 20.5% | $\chi^2=72.411$            | 27    | 19.7% | $\chi^2=54.825$            | 44         | 27.2% | $\chi^2=100.321$           | $\chi^2=(14,N=445)= 7.264;$  | .127          |
|                                   | LTO  | 23   | 15.8% | $p<.000$                   | 22    | 16.1% | $p<.000$                   | 29         | 17.9% | $p<.000$                   | $p=.924$                     |               |
|                                   | NET  | 44   | 30.1% |                            | 37    | 27.0% |                            | 45         | 27.8% |                            |                              |               |
|                                   | Z1   | 12   | 8.2%  |                            | 15    | 10.9% |                            | 12         | 7.4%  |                            |                              |               |
|                                   | Z2   | 4    | 2.7%  |                            | 4     | 2.9%  |                            | 2          | 1.2%  |                            |                              |               |
|                                   | Z3   | 4    | 2.7%  |                            | 2     | 1.5%  |                            | 4          | 2.5%  |                            |                              |               |
|                                   | Z4   | 11   | 7.5%  |                            | 13    | 9.5%  |                            | 11         | 6.8%  |                            |                              |               |
|                                   | Z5   | 18   | 12.3% |                            | 17    | 12.4% |                            | 15         | 9.3%  |                            |                              |               |
| WINNER                            | RW   | 62   | 42.5% | $\chi^2=3.315$             | 66    | 48.2% | $\chi^2=.182$              | 78         | 48.1% | $\chi^2=.222$              | $\chi^2=(2,N=445)= 1.280;$   | .054          |
|                                   | SW   | 84   | 57.5% | $p=.069$                   | 71    | 51.8% | $p=.669$                   | 84         | 51.9% | $p=.637$                   | $p=.527$                     |               |
| RESOLUTION                        | RWFE | 7    | 4.8%  | $\chi^2=37.123$            | 6     | 4.4%  | $\chi^2=20.971$            | 15         | 9.3%  | $\chi^2=44.296$            | $\chi^2=(10,N=445)= 12.958;$ | .168          |
|                                   | RWUE | 33   | 22.6% | $p<.000$                   | 31    | 22.6% | $p<.001$                   | 39         | 24.1% | $p<.000$                   | $p=.226$                     |               |
|                                   | RWW  | 22   | 15.1% |                            | 29    | 21.2% |                            | 24         | 14.8% |                            |                              |               |
|                                   | SWFE | 13   | 8.9%  |                            | 18    | 13.1% |                            | 12         | 7.4%  |                            |                              |               |
|                                   | SWUE | 44   | 30.1% |                            | 31    | 22.6% |                            | 52         | 32.1% |                            |                              |               |
|                                   | SWW  | 27   | 18.5% |                            | 22    | 16.1% |                            | 20         | 12.3% |                            |                              |               |

**Table S4.** Analysis of the effectiveness of the match patterns of women depending on the service and surface.

| Pattern (deuce)             | Clay (n=964) |      |      | Grass (n=854) |      |      | Hard court (n=941) |      |      | Pattern (advantage)         | Clay      |      |      | Grass     |       |      | Hard court |       |      |
|-----------------------------|--------------|------|------|---------------|------|------|--------------------|------|------|-----------------------------|-----------|------|------|-----------|-------|------|------------|-------|------|
|                             | Fr.          | %    | Ef.  | Fr.           | %    | Ef.  | Fr.                | %    | Ef.  |                             | Fr.       | %    | Ef.  | Fr.       | %     | Ef.  | Fr.        | %     | Ef.  |
| FS <sup>a</sup>             | 647          | 67.1 | 62.4 | 562           | 65.8 | 64.2 | 551                | 58.6 | 67.5 | -                           | -         | -    | -    | -         | -     | -    | -          | -     | -    |
| FS-SW                       | 404          | -    | -    | 361           | -    | -    | 372                | -    | -    | -                           | -         | -    | -    | -         | -     | -    | -          | -     | -    |
| FS-DE <sup>b</sup>          | 342          | 52.9 | -    | 300           | 53.4 | -    | 286                | 51.9 | -    | FS-AD <sup>b</sup>          | 305       | 47.1 | -    | 262       | 46.6  | -    | 265        | 48.1  | -    |
| FS-DE-SW <sup>c</sup>       | 213          | 52.7 | 62.3 | 192           | 53.2 | 64.0 | 194                | 52.2 | 67.8 | FS-AD-SW <sup>c</sup>       | 191       | 47.3 | 62.6 | 169       | 46.8  | 64.5 | 178        | 47.8  | 67.2 |
| FS-SH-SW                    | 291 (422)    | 65.2 | 69.0 | 251 (375)     | 66.7 | 66.9 | 298 (404)          | 73.3 | 73.8 | -                           | -         | -    | -    | -         | -     | -    | -          | -     | -    |
| FS-MD-SW                    | 82 (159)     | 24.6 | 51.6 | 76 (132)      | 23.5 | 57.6 | 53 (105)           | 19.1 | 50.5 | -                           | -         | -    | -    | -         | -     | -    | -          | -     | -    |
| FS-LN-SW                    | 31 (66)      | 10.2 | 47.0 | 34 (55)       | 9.8  | 61.8 | 21 (42)            | 7.6  | 50.0 | -                           | -         | -    | -    | -         | -     | -    | -          | -     | -    |
| FS-DE-CN-SW <sup>c</sup>    | 38 (72)      | 17.8 | 52.8 | 21 (42)       | 10.9 | 50.0 | 27 (48)            | 13.9 | 56.3 | FS-AD-CN-SW                 | 42 (68)   | 22.0 | 61.8 | 41 (64)   | 24.3  | 64.1 | 27 (46)    | 15.2  | 58.7 |
| FS-DE-T-SW <sup>c</sup>     | 104 (172)    | 48.8 | 60.5 | 97 (143)      | 50.5 | 67.8 | 87 (115)           | 44.8 | 75.7 | FS-AD-T-SW                  | 78 (115)  | 40.8 | 67.8 | 76 (117)  | 45.0  | 65.0 | 71 (113)   | 39.9  | 62.8 |
| FS-DE-W-SW <sup>c</sup>     | 71 (98)      | 33.3 | 72.4 | 74 (115)      | 38.5 | 64.3 | 80 (123)           | 41.2 | 65.0 | FS-AD-W-SW                  | 71 (122)  | 37.2 | 58.2 | 52 (81)   | 30.8  | 64.2 | 80 (106)   | 44.9  | 75.5 |
| FS-DE-SH-SW <sup>d</sup>    | 151 (222)    | 64.9 | 68.0 | 143 (213)     | 71.0 | 67.1 | 155 (217)          | 75.9 | 71.4 | FS-AD-SH-SW                 | 140 (200) | 65.6 | 70.0 | 108 (162) | 61.8  | 66.7 | 143 (187)  | 70.6  | 76.5 |
| FS-DE-CN-SH-SW <sup>c</sup> | 17 (32)      | 11.3 | 53.1 | 13 (24)       | 9.1  | 54.2 | 18 (31)            | 11.6 | 58.1 | FS-AD-CN-SH-SW <sup>c</sup> | 32 (46)   | 22.9 | 69.6 | 21 (34)   | 19.4  | 61.8 | 21 (33)    | 14.7  | 63.6 |
| FS-DE-T-SH-SW <sup>c</sup>  | 74 (114)     | 49.0 | 64.9 | 71 (102)      | 49.7 | 69.6 | 75 (93)            | 48.4 | 80.6 | FS-AD-T-SH-SW <sup>c</sup>  | 57 (76)   | 40.7 | 75.0 | 45 (69)   | 41.7  | 65.2 | 59 (81)    | 41.3  | 72.8 |
| FS-DE-W-SH-SW <sup>c</sup>  | 60 (76)      | 39.7 | 78.9 | 59 (87)       | 41.3 | 67.8 | 62 (93)            | 40.0 | 66.7 | FS-AD-W-SH-SW <sup>c</sup>  | 51 (78)   | 36.4 | 65.4 | 42 (59)   | 38.9  | 71.2 | 63 (73)    | 44.1  | 86.3 |
| FS-DE-CN-SH-SW-SWFE         | 2            | 11.8 | -    | 1             | 7.7  | -    | 1                  | 5.6  | -    | FS-AD-CN-SH-SW-SWFE         | 9         | 28.1 | -    | 1         | 4.8   | -    | 6          | 28.6  | -    |
| FS-DE-CN-SH-SW-SWUE         | 10           | 58.8 | -    | 11            | 84.6 | -    | 12                 | 66.7 | -    | FS-AD-CN-SH-SW-SWUE         | 19        | 59.4 | -    | 14        | 66.7  | -    | 10         | 47.6  | -    |
| FS-DE-CN-SH-SW-SWW          | 5            | 29.8 | -    | 1             | 7.7  | -    | 5                  | 27.8 | -    | FS-AD-CN-SH-SW-SWW          | 4         | 12.5 | -    | 6         | 28.6  | -    | 5          | 23.8  | -    |
| FS-DE-T-SH-SW-SWFE          | 19           | 25.7 | -    | 23            | 32.4 | -    | 20                 | 26.7 | -    | FS-AD-T-SH-SW-SWFE          | 20        | 35.1 | -    | 9         | 20.0  | -    | 11         | 18.6  | -    |
| FS-DE-T-SH-SW-SWUE          | 20           | 27.0 | -    | 18            | 25.4 | -    | 16                 | 21.3 | -    | FS-AD-T-SH-SW-SWUE          | 10        | 17.5 | -    | 13        | 28.9  | -    | 19         | 32.2  | -    |
| FS-DE-T-SH-SW-SWW           | 35           | 47.3 | -    | 30            | 42.3 | -    | 39                 | 52.0 | -    | FS-AD-T-SH-SW-SWW           | 27        | 47.4 | -    | 23        | 51.1  | -    | 29         | 49.2  | -    |
| FS-DE-W-SH-SW-SWFE          | 23           | 38.3 | -    | 14            | 23.7 | -    | 17                 | 27.4 | -    | FS-AD-W-SH-SW-SWFE          | 18        | 35.3 | -    | 10        | 23.8  | -    | 19         | 30.2  | -    |
| FS-DE-W-SH-SW-SWUE          | 15           | 25.0 | -    | 13            | 22.0 | -    | 17                 | 27.4 | -    | FS-AD-W-SH-SW-SWUE          | 16        | 31.4 | -    | 12        | 28.6  | -    | 10         | 15.9  | -    |
| FS-DE-W-SH-SW-SWW           | 22           | 36.7 | -    | 32            | 54.2 | -    | 28                 | 45.2 | -    | FS-AD-W-SH-SW-SWW           | 17        | 33.3 | -    | 20        | 47.6  | -    | 34         | 54.0  | -    |
| FS-DE-MD-SW <sup>d</sup>    | 48 (89)      | 26.0 | 53.9 | 32 (61)       | 20.3 | 52.5 | 27 (48)            | 16.8 | 56.3 | FS-AD-MD-SW                 | 34 (70)   | 23.0 | 48.6 | 44 (71)   | 27.1  | 62.0 | 26 (57)    | 21.5  | 45.6 |
| FS-DE-CN-MD-SW <sup>c</sup> | 15 (28)      | 31.3 | 53.6 | 6 (13)        | 18.8 | 46.2 | 7 (14)             | 25.9 | 50.0 | FS-AD-CN-MD-SW <sup>c</sup> | 4 (12)    | 11.8 | 33.3 | 15 (19)   | 34.1  | 78.9 | 4 (10)     | 15.4  | 40.0 |
| FS-DE-T-MD-SW <sup>c</sup>  | 25 (43)      | 52.1 | 58.1 | 17 (30)       | 53.1 | 56.7 | 7 (15)             | 25.9 | 46.7 | FS-AD-T-MD-SW <sup>c</sup>  | 17 (30)   | 50.0 | 56.7 | 20 (32)   | 45.5  | 62.5 | 10 (24)    | 38.5  | 41.7 |
| FS-DE-W-MD-SW <sup>c</sup>  | 8 (18)       | 16.7 | 44.4 | 9 (18)        | 28.1 | 50.0 | 13 (19)            | 48.1 | 68.4 | FS-AD-W-MD-SW <sup>c</sup>  | 13 (28)   | 38.2 | 46.4 | 9 (20)    | 20.5  | 45.0 | 12 (23)    | 46.2  | 52.2 |
| FS-DE-CN-MD-SW-SWFE         | 2            | 13.3 | -    | 2             | 33.3 | -    | 2                  | 28.6 | -    | FS-AD-CN-MD-SW-SWFE         | 2         | -    | -    | 3         | 20.0  | -    | -          | -     | -    |
| FS-DE-CN-MD-SW-SWUE         | 9            | 60.0 | -    | 3             | 50.0 | -    | 1                  | 14.3 | -    | FS-AD-CN-MD-SW-SWUE         | 2         | 50.0 | -    | 9         | 60.0  | -    | 4          | 100.0 | -    |
| FS-DE-CN-MD-SW-SWW          | 4            | 26.7 | -    | 1             | 16.7 | -    | 4                  | 57.1 | -    | FS-AD-CN-MD-SW-SWW          | 2         | 50.0 | -    | 3         | 20.0  | -    | -          | -     | -    |
| FS-DE-T-MD-SW-SWFE          | 8            | 32.0 | -    | 5             | 29.4 | -    | 2                  | 28.6 | -    | FS-AD-T-MD-SW-SWFE          | 3         | 17.6 | -    | 4         | 20.0  | -    | 3          | 30.0  | -    |
| FS-DE-T-MD-SW-SWUE          | 9            | 36.0 | -    | 9             | 52.9 | -    | 2                  | 28.6 | -    | FS-AD-T-MD-SW-SWUE          | 10        | 58.8 | -    | 11        | 55.0  | -    | 7          | 70.0  | -    |
| FS-DE-T-MD-SW-SWW           | 8            | 32.0 | -    | 3             | 17.9 | -    | 3                  | 42.9 | -    | FS-AD-T-MD-SW-SWW           | 4         | 23.5 | -    | 5         | 25.0  | -    | -          | -     | -    |
| FS-DE-W- MD -SW-SWFE        | 1            | 12.5 | -    | -             | -    | -    | 5                  | 38.5 | -    | FS-AD-W- MD -SW-SWFE        | 6         | 46.2 | -    | 3         | 33.3  | -    | 5          | 41.7  | -    |
| FS-DE-W-MD-SW-SWUE          | 5            | 62.5 | -    | 4             | 44.4 | -    | 4                  | 30.8 | -    | FS-AD-W-MD-SW-SWUE          | 3         | 23.1 | -    | 3         | 33.3  | -    | 5          | 41.7  | -    |
| FS-DE-W-MD-SW-SWW           | 8            | 25.0 | -    | 5             | 55.6 | -    | 4                  | 30.8 | -    | FS-AD-W-MD-SW-SWW           | 4         | 30.8 | -    | 3         | 33.3  | -    | 2          | 16.7  | -    |
| FS-DE-LN-SW <sup>d</sup>    | 14 (31)      | 9.1  | 45.2 | 17 (26)       | 8.7  | 65.4 | 12 (21)            | 7.3  | 57.1 | FS-AD-LN-SW                 | 17 (35)   | 11.5 | 48.6 | 17 (29)   | 11.1  | 58.6 | 9 (21)     | 7.9   | 42.9 |
| FS-DE-CN-LN-SW <sup>c</sup> | 6 (12)       | 42.9 | 50.0 | 2 (5)         | 11.8 | 40.0 | 2 (3)              | 16.7 | 66.7 | FS-AD-CN-LN-SW <sup>c</sup> | 6 (10)    | 35.3 | 60.0 | 5 (11)    | 29.4  | 45.5 | 2 (3)      | 22.2  | 66.7 |
| FS-DE-T-LN-SW <sup>c</sup>  | 5 (15)       | 35.7 | 33.3 | 9 (11)        | 52.9 | 81.8 | 5 (7)              | 41.7 | 71.4 | FS-AD-T-LN-SW <sup>c</sup>  | 4 (9)     | 23.5 | 44.4 | 11 (16)   | 64.7  | 68.8 | 2 (8)      | 22.2  | 25.0 |
| FS-DE-W-LN-SW <sup>c</sup>  | 3 (4)        | 21.4 | 75.0 | 6 (10)        | 35.2 | 60.0 | 5 (11)             | 41.7 | 45.5 | FS-AD-W-LN-SW <sup>c</sup>  | 7 (16)    | 41.2 | 43.8 | 1 (2)     | 5.9   | 50.0 | 5 (10)     | 55.6  | 50.0 |
| FS-DE-CN-LN-SW-SWFE         | 1            | 16.7 | -    | 1             | 50.0 | -    | 1                  | 50.0 | -    | FS-AD-CN-LN-SW-SWFE         | 1         | 16.7 | -    | -         | -     | -    | 2          | 100.0 | -    |
| FS-DE-CN-LN-SW-SWUE         | 4            | 66.7 | -    | -             | -    | -    | 1                  | 50.0 | -    | FS-AD-CN-LN-SW-SWUE         | 1         | 16.7 | -    | 3         | 60.0  | -    | -          | -     | -    |
| FS-DE-CN-LN-SW-SWW          | 1            | 16.7 | -    | 1             | 50.0 | -    | -                  | -    | -    | FS-AD-CN-LN-SW-SWW          | 4         | 66.7 | -    | 2         | 40.0  | -    | -          | -     | -    |
| FS-DE-T-LN-SW-SWFE          | 1            | 20.0 | -    | 2             | 22.2 | -    | 2                  | 40.0 | -    | FS-AD-T-LN-SW-SWFE          | 2         | 50.0 | -    | 3         | 27.3  | -    | -          | -     | -    |
| FS-DE-T-LN-SW-SWUE          | 2            | 40.0 | -    | 3             | 33.3 | -    | 3                  | 60.0 | -    | FS-AD-T-LN-SW-SWUE          | 1         | 25.0 | -    | 1         | 9.1   | -    | 1          | 50.0  | -    |
| FS-DE-T-LN-SW-SWW           | 2            | 40.0 | -    | 4             | 44.4 | -    | -                  | -    | -    | FS-AD-T-LN-SW-SWW           | 1         | 25.0 | -    | 7         | 63.6  | -    | 1          | 50.0  | -    |
| FS-DE-W-LN-SW-SWFE          | 1            | 33.3 | -    | 4             | 66.7 | -    | -                  | -    | -    | FS-AD-W-LN-SW-SWFE          | -         | -    | -    | -         | -     | -    | 2          | 40.0  | -    |
| FS-DE-W-LN-SW-SWUE          | 1            | 33.3 | -    | 1             | 16.7 | -    | 1                  | 20.0 | -    | FS-AD-W-LN-SW-SWUE          | 4         | 57.1 | -    | -         | -     | -    | 3          | 60.0  | -    |
| FS-DE-W-LN-SW-SWW           | 1            | 33.3 | -    | 1             | 16.7 | -    | 4                  | 80.0 | -    | FS-AD-W-LN-SW-SWW           | 3         | 42.9 | -    | 1         | 100.0 | -    | -          | -     | -    |

Table S4. Continuation.

| Pattern (deuce)             | Clay (n=964) |       |      | Grass (n=854) |       |       | Hard court (n=941) |      |      | Pattern (advantage) | Clay    |      |      | Grass   |       |      | Hard court |      |      |
|-----------------------------|--------------|-------|------|---------------|-------|-------|--------------------|------|------|---------------------|---------|------|------|---------|-------|------|------------|------|------|
|                             | Fr.          | %     | Ef.  | Fr.           | %     | Ef.   | Fr.                | %    | Ef.  |                     | Fr.     | %    | Ef.  | Fr.     | %     | Ef.  | Fr.        | %    | Ef.  |
| SS <sup>a</sup>             | 290          | 30.1  | 56.9 | 270           | 31.6  | 53.0  | 345                | 36.7 | 53.0 | -                   | -       | -    | -    | -       | -     | -    | -          | -    | -    |
| SS-SW                       | 165          | -     | -    | 143           | -     | -     | 183                | -    | -    | -                   | -       | -    | -    | -       | -     | -    | -          | -    | -    |
| SS-DE                       | 144          | 49.7  | -    | 133           | 49.3  | -     | 183                | 53.0 | -    | SS-AD               | 146     | 50.3 | -    | 137     | 50.7  | -    | 162        | 47.0 | -    |
| SS-DE-SW <sup>b</sup>       | 81           | 49.1  | 56.7 | 72            | 50.3  | 54.1  | 99                 | 54.1 | 54.1 | SS-AD-SW            | 84      | 50.9 | 57.5 | 71      | 49.7  | 51.8 | 84         | 45.9 | 51.9 |
| SS-SH-SW                    | 100 (165)    | 59.6  | 60.6 | 96 (168)      | 62.2  | 57.1  | 112 (218)          | 63.2 | 51.4 | -                   | -       | -    | -    | -       | -     | -    | -          | -    | -    |
| SS-MD-SW                    | 38 (69)      | 23.8  | 55.1 | 33 (71)       | 26.3  | 46.5  | 48 (86)            | 24.9 | 55.8 | -                   | -       | -    | -    | -       | -     | -    | -          | -    | -    |
| SS-LN-SW                    | 27 (56)      | 19.3  | 48.2 | 14 (31)       | 11.5  | 45.2  | 23 (41)            | 11.9 | 56.1 | -                   | -       | -    | -    | -       | -     | -    | -          | -    | -    |
| SS-DE-CN-SW <sup>b</sup>    | 33 (59)      | 40.7  | 55.9 | 37 (72)       | 51.4  | 51.4  | 41 (81)            | 41.4 | 50.6 | SS-AD-CN-SW         | 36 (61) | 42.9 | 59.0 | 43 (82) | 60.6  | 52.4 | 35 (75)    | 41.7 | 46.7 |
| SS-DE-T-SW <sup>b</sup>     | 35 (61)      | 43.2  | 57.4 | 22 (40)       | 30.6  | 55.0  | 31 (57)            | 31.3 | 54.4 | SS-AD-T-SW          | 11 (22) | 13.1 | 50.0 | 14 (26) | 19.7  | 53.8 | 23 (38)    | 27.4 | 60.5 |
| SS-DE-W-SW <sup>b</sup>     | 13 (24)      | 16.0  | 54.2 | 13 (21)       | 18.1  | 61.9  | 27 (45)            | 27.3 | 60.0 | SS-AD-W-SW          | 37 (63) | 44.0 | 58.7 | 14 (29) | 19.7  | 48.3 | 26 (49)    | 31.0 | 53.1 |
| SS-DE-SH-SW <sup>d</sup>    | 50 (84)      | 56.3  | 61.7 | 9 (21)        | 61.7  | 42.9  | 60 (111)           | 60.7 | 54.1 | SS-AD-SH-SW         | 50 (84) | 57.5 | 59.5 | 50 (86) | 62.8  | 58.1 | 52 (107)   | 66.0 | 48.6 |
| SS-DE-CN-SH-SW <sup>b</sup> | 19 (32)      | 38.0  | 59.4 | 21 (44)       | 45.7  | 47.7  | 19 (43)            | 31.7 | 44.2 | SS-AD-CN-SH-SW      | 22 (35) | 44.0 | 62.9 | 28 (50) | 56.0  | 56.0 | 17 (50)    | 32.7 | 34.0 |
| SS-DE-T-SH-SW <sup>b</sup>  | 19 (31)      | 38.0  | 61.3 | 14 (21)       | 30.4  | 66.7  | 21 (35)            | 35.0 | 60.0 | SS-AD-T-SH-SW       | 5 (12)  | 10.0 | 41.7 | 9 (18)  | 18.0  | 50.0 | 15 (24)    | 28.8 | 62.5 |
| SS-DE-W-SH-SW <sup>b</sup>  | 12 (18)      | 24.0  | 66.7 | 11 (17)       | 23.9  | 64.7  | 20 (33)            | 33.3 | 60.6 | SS-AD-W-SH-SW       | 23 (37) | 46.0 | 63.2 | 13 (18) | 26.0  | 72.2 | 20 (33)    | 38.5 | 60.6 |
| SS-DE-CN-SH-SW-SWFE         | 2            | 10.5  | -    | 2             | 9.5   | -     | 1                  | 5.3  | -    | SS-AD-CN-SH-SW-SWFE | 2       | 9.1  | -    | 3       | 10.7  | -    | 1          | 5.9  | -    |
| SS-DE-CN-SH-SW-SWUE         | 10           | 52.6  | -    | 12            | 57.1  | -     | 14                 | 73.7 | -    | SS-AD-CN-SH-SW-SWUE | 13      | 59.1 | -    | 18      | 64.3  | -    | 14         | 82.4 | -    |
| SS-DE-CN-SH-SW-SWW          | 7            | 36.8  | -    | 7             | 33.3  | -     | 4                  | 21.1 | -    | SS-AD-CN-SH-SW-SWW  | 7       | 31.8 | -    | 7       | 25.0  | -    | 2          | 11.8 | -    |
| SS-DE-T-SH-SW-SWFE          | 4            | 21.1  | -    | 2             | 14.3  | -     | 1                  | 4.8  | -    | SS-AD-T-SH-SW-SWFE  | 1       | 20.0 | -    | 1       | 11.1  | -    | 2          | 13.3 | -    |
| SS-DE-T-SH-SW-SWUE          | 13           | 68.4  | -    | 7             | 50.0  | -     | 16                 | 76.2 | -    | SS-AD-T-SH-SW-SWUE  | 3       | 60.0 | -    | 3       | 33.3  | -    | 8          | 53.3 | -    |
| SS-DE-T-SH-SW-SWW           | 2            | 10.5  | -    | 5             | 35.7  | -     | 4                  | 19.0 | -    | SS-AD-T-SH-SW-SWW   | 1       | 20.0 | -    | 5       | 55.6  | -    | 5          | 33.3 | -    |
| SS-DE-W-SH-SW-SWFE          | 1            | 8.3   | -    | 3             | 27.3  | -     | 1                  | 5.0  | -    | SS-AD-W-SH-SW-SWFE  | 3       | 13.0 | -    | 5       | 38.5  | -    | 1          | 5.0  | -    |
| SS-DE-W-SH-SW-SWUE          | 6            | 50.0  | -    | 3             | 27.3  | -     | 17                 | 85.0 | -    | SS-AD-W-SH-SW-SWUE  | 15      | 65.2 | -    | 4       | 30.8  | -    | 13         | 65.0 | -    |
| SS-DE-W-SH-SW-SWW           | 5            | 41.7  | -    | 5             | 45.5  | -     | 2                  | 10.0 | -    | SS-AD-W-SH-SW-SWW   | 5       | 21.7 | -    | 4       | 30.8  | -    | 6          | 30.0 | -    |
| SS-DE-MD-SW <sup>d</sup>    | 16 (31)      | 21.5  | 51.6 | 17 (30)       | 22.6  | 56.7  | 28 (51)            | 27.9 | 54.9 | SS-AD-MD-SW         | 22 (38) | 26.0 | 57.9 | 16 (41) | 29.9  | 39.0 | 20 (35)    | 21.6 | 57.1 |
| SS-DE-CN-MD-SW <sup>b</sup> | 7 (12)       | 43.8  | 58.3 | 9 (17)        | 52.9  | 52.9  | 16 (28)            | 57.1 | 57.1 | SS-AD-CN-MD-SW      | 9 (17)  | 40.9 | 52.9 | 11 (25) | 68.8  | 44.0 | 9 (12)     | 45.0 | 75.0 |
| SS-DE-T-MD-SW <sup>b</sup>  | 8 (17)       | 50.0  | 47.1 | 6 (11)        | 35.3  | 54.5  | 8 (16)             | 28.6 | 50.0 | SS-AD-T-MD-SW       | 4 (7)   | 18.2 | 57.1 | 5 (7)   | 31.3  | 71.4 | 5 (10)     | 25.0 | 50.0 |
| SS-DE-W-MD-SW <sup>b</sup>  | 1 (2)        | 6.3   | 50.0 | 2 (2)         | 11.8  | 100.0 | 4 (7)              | 14.3 | 57.1 | SS-AD-W-MD-SW       | 9 (14)  | 40.9 | 64.3 | - (9)   | 0.0   | -    | 6 (13)     | 30.0 | 46.2 |
| SS-DE-CN-MD-SW-SWFE         | 2            | 28.6  | -    | 1             | 11.1  | -     | 2                  | 12.5 | -    | SS-AD-CN-MD-SW-SWFE | 2       | 22.2 | -    | 6       | 54.5  | -    | 1          | 11.1 | -    |
| SS-DE-CN-MD-SW-SWUE         | 2            | 28.6  | -    | 5             | 55.6  | -     | 7                  | 43.8 | -    | SS-AD-CN-MD-SW-SWUE | 3       | 33.3 | -    | 3       | 27.3  | -    | 7          | 77.8 | -    |
| SS-DE-CN-MD-SW-SWW          | 3            | 42.9  | -    | 3             | 33.3  | -     | 7                  | 43.8 | -    | SS-AD-CN-MD-SW-SWW  | 4       | 44.4 | -    | 2       | 18.2  | -    | 1          | 11.1 | -    |
| SS-DE-T-MD-SW-SWFE          | 3            | 37.5  | -    | 1             | 16.7  | -     | 3                  | 37.5 | -    | SS-AD-T-MD-SW-SWFE  | 1       | 25.0 | -    | 2       | 40.0  | -    | 2          | 40.0 | -    |
| SS-DE-T-MD-SW-SWUE          | 4            | 50.0  | -    | 4             | 66.7  | -     | 4                  | 50.0 | -    | SS-AD-T-MD-SW-SWUE  | 2       | 50.0 | -    | 1       | 20.0  | -    | 2          | 40.0 | -    |
| SS-DE-T-MD-SW-SWW           | 1            | 12.5  | -    | 1             | 16.7  | -     | 1                  | 12.5 | -    | SS-AD-T-MD-SW-SWW   | 1       | 25.0 | -    | 2       | 40.0  | -    | 1          | 20.0 | -    |
| SS-DE-W-MD-SW-SWFE          | -            | -     | -    | -             | -     | -     | 2                  | 50.0 | -    | SS-AD-W-MD-SW-SWFE  | 3       | 33.3 | -    | -       | -     | -    | 2          | 33.3 | -    |
| SS-DE-W-MD-SW-SWUE          | -            | -     | -    | -             | -     | -     | 1                  | 25.0 | -    | SS-AD-W-MD-SW-SWUE  | 2       | 22.2 | -    | -       | -     | -    | 1          | 16.7 | -    |
| SS-DE-W-MD-SW-SWW           | 1            | 100.0 | -    | 2             | 100.0 | -     | 1                  | 25.0 | -    | SS-AD-W-MD-SW-SWW   | 4       | 44.4 | -    | -       | -     | -    | 3          | 50.0 | -    |
| SS-DE-LN-SW <sup>d</sup>    | 15 (32)      | 22.2  | 46.9 | 46 (82)       | 15.8  | 56.1  | 11 (21)            | 11.5 | 52.4 | SS-AD-LN-SW         | 12 (24) | 16.4 | 50.0 | 5 (10)  | 7.3   | 50.0 | 12 (20)    | 12.3 | 60.0 |
| SS-DE-CN-LN-SW <sup>b</sup> | 7 (15)       | 46.7  | 46.7 | 7 (11)        | 77.8  | 63.6  | 6 (10)             | 54.5 | 60.0 | SS-AD-CN-LN-SW      | 5 (9)   | 41.7 | 55.6 | 4 (7)   | 80.0  | 57.1 | 9 (13)     | 75.0 | 69.2 |
| SS-DE-T-LN-SW <sup>b</sup>  | 8 (13)       | 53.3  | 61.5 | 2 (8)         | 22.2  | 25.0  | 2 (6)              | 18.2 | 33.3 | SS-AD-T-LN-SW       | 2 (3)   | 16.7 | 66.7 | - (1)   | 0.0   | -    | 3 (4)      | 25.0 | 75.0 |
| SS-DE-W-LN-SW <sup>b</sup>  | - (4)        | -     | 0.0  | - (2)         | -     | 0.0   | 3 (5)              | 27.3 | 60.0 | SS-AD-W-LN-SW       | 5 (12)  | 41.7 | 41.7 | 1 (2)   | 20.0  | 50.0 | - (3)      | -    | 0.0  |
| SS-DE-CN-LN-SW-SWFE         | -            | -     | -    | 3             | 42.9  | -     | 1                  | 16.7 | -    | SS-AD-CN-LN-SW-SWFE | -       | -    | -    | -       | -     | -    | 2          | 22.2 | -    |
| SS-DE-CN-LN-SW-SWUE         | 5            | 71.4  | -    | 1             | 14.3  | -     | 5                  | 83.3 | -    | SS-AD-CN-LN-SW-SWUE | 4       | 80.0 | -    | 2       | 50.0  | -    | 5          | 55.6 | -    |
| SS-DE-CN-LN-SW-SWW          | 2            | 28.6  | -    | 3             | 42.9  | -     | -                  | -    | -    | SS-AD-CN-LN-SW-SWW  | 1       | 20.0 | -    | 2       | 50.0  | -    | 2          | 22.2 | -    |
| SS-DE-T-LN-SW-SWFE          | 1            | 12.5  | -    | -             | -     | -     | 1                  | 50.0 | -    | SS-AD-T-LN-SW-SWFE  | 1       | 50.0 | -    | -       | -     | -    | 1          | 33.3 | -    |
| SS-DE-T-LN-SW-SWUE          | 5            | 62.5  | -    | 1             | 50.0  | -     | 1                  | 50.0 | -    | SS-AD-T-LN-SW-SWUE  | 1       | 50.0 | -    | -       | -     | -    | 2          | 66.7 | -    |
| SS-DE-T-LN-SW-SWW           | 2            | 25.0  | -    | 1             | 50.0  | -     | -                  | -    | -    | SS-AD-T-LN-SW-SWW   | -       | -    | -    | -       | -     | -    | -          | -    | -    |
| SS-DE-W-LN-SW-SWFE          | -            | -     | -    | -             | -     | -     | 1                  | 33.3 | -    | SS-AD-W-LN-SW-SWFE  | -       | -    | -    | 1       | 100.0 | -    | -          | -    | -    |
| SS-DE-W-LN-SW-SWUE          | -            | -     | -    | -             | -     | -     | -                  | -    | -    | SS-AD-W-LN-SW-SWUE  | 1       | 20.0 | -    | -       | -     | -    | -          | -    | -    |
| SS-DE-W-LN-SW-SWW           | -            | -     | -    | -             | -     | -     | 2                  | 66.7 | -    | SS-AD-W-LN-SW-SWW   | 4       | 80.0 | -    | -       | -     | -    | -          | -    | -    |

Fr.= Frequency; Ef.= Effectiveness. a: The percentage refers to the relation FS/SS/DF about the total points analyzed. The effectiveness refers to the points won with second service by the player that serves; b: the percentage refers to the distribution of the points played with first service depending on the place (DE/AD); c: the frequency determines the number of points played with the pattern indicated (frequency of this pattern without considering the winner criteria –SW-). The percentage refers to the distribution of the points with first service depending on the zone (CN/T/W) and the effectiveness refers to the points won by the player that serves without considering the winning criteria (SW)
